# Supplementary material for: Eutrophication induces shifts in the trophic position of invertebrates in aquatic food webs
Source: PubMed Central journal article supplement (PMC7988625; doi:10.1002/ecy.3275), 2021-02-13
Supplement: ECY-102-e03275-s003.pdf [file ECY-102-e03275-s003.pdf]

**Supporting Information.** van der Lee, G.H., J.A. Vonk, R.C.M. Verdonschot, M.H.S. Kraak, P.F.M. Verdonschot, and J. Huisman. 2021. Eutrophication induces shifts in the trophic position of invertebrates in aquatic food webs. *Ecology*.

## Appendix S1

**Table S1.** Overview of functional feeding groups assigned according to Merritt & Cummins (1996) and the *freshwaterecology.info* database (Tachet 2000, Schmidt-Kloiber and Hering 2015). Abbreviations stand for CG = collector-gatherer, SH = shredder, CF = collector-filterer, SC = scraper, PE = predator and PI = piercer.

|                                                 | Merritt & Cummins<br>(1996) | Freshwaterecology.info |          |         |               |         |          | Assigned |
|-------------------------------------------------|-----------------------------|------------------------|----------|---------|---------------|---------|----------|----------|
|                                                 |                             | deposit feeder         | shredder | scraper | filter-feeder | piercer | predator |          |
| <b>Primary consumers</b>                        |                             |                        |          |         |               |         |          |          |
| Amphipoda:                                      | -                           | 0                      | 3        | (1)     | 0             | 0       | 0        | SH       |
| Crangonyctidae/Gammaridae                       |                             |                        |          |         |               |         |          |          |
| Asellidae                                       | -                           | 0                      | 3        | 0       | 0             | 0       | 0        | SH       |
| <i>Bithynia</i> spp.                            | -                           | 0                      | 0        | 1       | 2             | 0       | 0        | CF       |
| <i>Cloeon</i> spp.                              | CG & SC                     | 3                      | 1        | 3       | 0             | 0       | 0        | CG       |
| <i>Lymnaea</i> spp.                             | -                           | 0                      | 1        | 3       | 0             | 0       | 2?       | SC       |
| <i>Planorbarius</i> spp                         | -                           | 0                      | 3        | 1       | 0             | 0       | 0        | SC       |
| <i>Planorbis</i> spp.                           | -                           | 0                      | 1        | 2       | 0             | 0       | 0        | SC       |
| Sphaeriidae                                     | -                           | 0                      | 0        | 0       | 3             | 0       | 0        | CF       |
| <i>Valvata</i> spp.                             | -                           | 0                      | 1        | 2       | 2             | 0       | 0        | SC       |
| <b>Secondary consumers: Potential omnivores</b> |                             |                        |          |         |               |         |          |          |
| Corixinae:                                      | PI (carnivore) & CG         | 0                      | 3        | 2       | 0             | 2       | 0        | PI & CG  |
| <i>Hesperocorixa</i> spp./ <i>Sigara</i> spp.   |                             |                        |          |         |               |         |          |          |
| <i>Noterus</i> spp.                             | PR & CG                     | 0                      | 3        | 0       | 0             | 0       | 3        | PR & CG  |
| Phryganeidae:                                   | PR & SH                     | 0                      | 3        | 1       | 0             | 0       | 1        | PR & SH  |
| <i>Agrypnia</i> spp./ <i>Phryganea</i> spp.     |                             |                        |          |         |               |         |          |          |
| <b>Secondary consumers: Strict carnivores</b>   |                             |                        |          |         |               |         |          |          |
| Anisoptera                                      | PR                          | 0                      | 0        | 0       | 0             | 0       | 3        | PR       |
| <i>Erpobdella</i> spp.                          | -                           | 0                      | 0        | 0       | 0             | 0       | 3        | PR       |
| <i>Ilyocoris</i> spp.                           | PI (carnivore)              | 0                      | 0        | 0       | 0             | 3       | 0        | PI       |
| <i>Notonecta</i> spp.                           | PI (carnivore)              | 0                      | 0        | 0       | 0             | 3       | 1        | PI       |
| Zygoptera                                       | PR                          | 0                      | 0        | 0       | 0             | 0       | 3        | PR       |

## References

- Merritt, R. W., & Cummins, K. W. (Eds.). 1996. *An Introduction to the Aquatic Insects of North America*. Kendall Hunt: Dubuque, IA, USA.
- Tachet H., Bournaud M., Richoux P., and Usseglio-Polatera P. 2000. *Invértebrés d'eau douce: systématique, biologie, écologie*. CNRS Editions: Paris.
- Schmidt-Kloiber, A., & Hering, D. 2015. [www.freshwaterecology.info](http://www.freshwaterecology.info) – An online tool that unifies, standardises and codifies more than 20,000 European freshwater organisms and their ecological preferences. *Ecological Indicators* 53: 271-282.
